# Supplementary material
Source: MDPI journal article supplement (https://www.mdpi.com/2073-4395/13/8/1978)
Supplement: s1 [file s1]

## Supplementary Figure and Table Legends

Figure S1. Cadmium stress repress the growth of roots and shoots of rice seedlings.

2-d-old seedlings germinated on 1/2MS plates transferred to new plates supplemented with or without 50, 100, or 200  $\mu\text{M}$   $\text{CdCl}_2$ , and then root (A) and shoot (B) length were measured at 1, 2, 3, 4, and 5 days after transfer. The results shown are the mean  $\pm$  SD. Values are derived from three independent biological experiments.

Table S1. Primers used for qRT-PCR analysis in this study. F: forward; R: reverse.
