# Supplementary material
Source: MDPI journal article supplement (https://www.mdpi.com/2073-4395/13/8/1978)
Supplement: s1 [file s1]

**Table S1. Primers used for qRT-PCR analysis in this study. F: forward; R: reverse.**

| <b>Primer name</b>                  | <b>Sequence (5' to 3')</b> |
|-------------------------------------|----------------------------|
| <i>OsCdl</i> F                      | TCAGCTGCATCACCAAGCACT      |
| <i>OsCdl</i> R                      | TCTCTTGTTGTGCTCCGCGA       |
| <i>OsCAL1</i> F                     | AGTCGCGTGTTCTCCTTTGT       |
| <i>OsCAL1</i> R                     | CATGACAGCAGCTTGCAAAT       |
| <i>OsNRAMP5</i> F                   | GTCAAGACTGATTGGATCATGC     |
| <i>OsNRAMP5</i> R                   | CCAATCATCCAACCTGAGAGA      |
| <i>OsIRT2</i> F                     | CGTTCCACACGCGGGGCAGCAAG    |
| <i>OsIRT2</i> R                     | GGATGATGATCCGTACGGCAGAAG   |
| <i>OsASMT1</i> F                    | CGCCAAGGCTCCCAGTAACAAC     |
| <i>OsASMT1</i> R                    | TGATCGTGCGCACTACTGACTCC    |
| <i>OsTDC1</i> F                     | GCGAGGGTGAAACCTTCCA        |
| <i>OsTDC1</i> R                     | GCGAGCCGGTGGAGTCC          |
| <i>OsTDC3</i> F                     | ATTCACGTGGCAGGCGGC         |
| <i>OsTDC3</i> R                     | TGATGCCCCGCCACGCCATTG      |
| <i>OsSNAT2</i> F                    | CAACAGGAGTGCGTGTGCG        |
| <i>OsSNAT2</i> R                    | CACACCACCTCGCTGTGCT        |
| <i>OsCATA</i> F                     | GCCGGATAGACAGGAGAGGT       |
| <i>OsCATA</i> R                     | TCTTCACATGCTTGGCTTCA       |
| <i>OsCATB</i> F                     | GGTGGGTTGATGCTCTCTCA       |
| <i>OsCATB</i> R                     | ATTCCTCCTGGCCGATCTAC       |
| <i>OsPOX1</i> F                     | CATCCCAGCTCCCAACAA         |
| <i>OsPOX1</i> R                     | AGACATGCCAATGGTGTGG        |
| <i>OseEF1<math>\alpha</math></i> F  | TTTCACTCTTGGTGTGAAGCAGAT   |
| <i>OseEF-1<math>\alpha</math></i> R | GACTTCCTTCACGATTTCATCGTAA  |
